# Supplementary material for: Improving the performance of perovskite solar cells using a dual-hole transport layer
Source: Royal Society of Chemistry journal article supplement (doi:10.1039/d3dt03501h), 2023-11-29
Supplement: d3dt03501h1.pdf [file d3dt03501h1.pdf]

# Improving the performance of perovskite solar cells using a dual-hole transport layer

Chenghao Song,<sup>a</sup> Huiwei Du,<sup>\*a</sup> Menglei Xu,<sup>\*b</sup> Jie Yang,<sup>b</sup> Xinyu Zhang,<sup>b</sup> Jungan Wang,<sup>b</sup> Yuanfang Zhang,<sup>b</sup> Chengjun Gu,<sup>b</sup> Rui Li,<sup>a</sup> Tao Hong,<sup>a</sup> Jingji Zhang,<sup>a</sup> Jiangying Wang<sup>a</sup> and Yongchun Ye<sup>a</sup>

<sup>a</sup> *College of Materials and Chemistry, China Jiliang University, Hangzhou, 310018, Zhejiang, China*

<sup>b</sup> *JinkoSolar, Haining, 314400, Zhejiang, China*

\* Corresponding author.

E-mail address: duhw@cjlu.edu.cn (H. W. Du); Menglei.xu@jinkosolar.com (M. L. Xu)

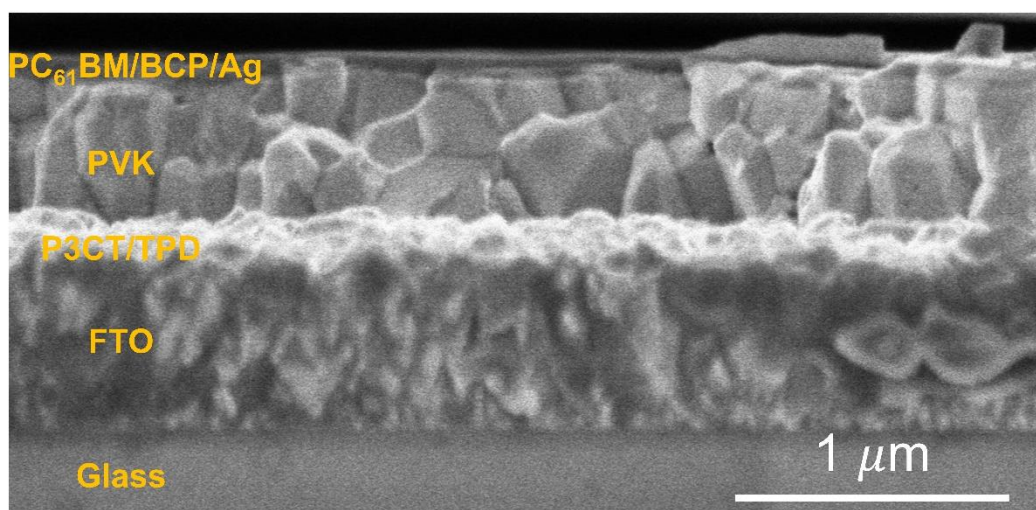

Figure S1 Inverted structure of the triple cation perovskite solar cell.

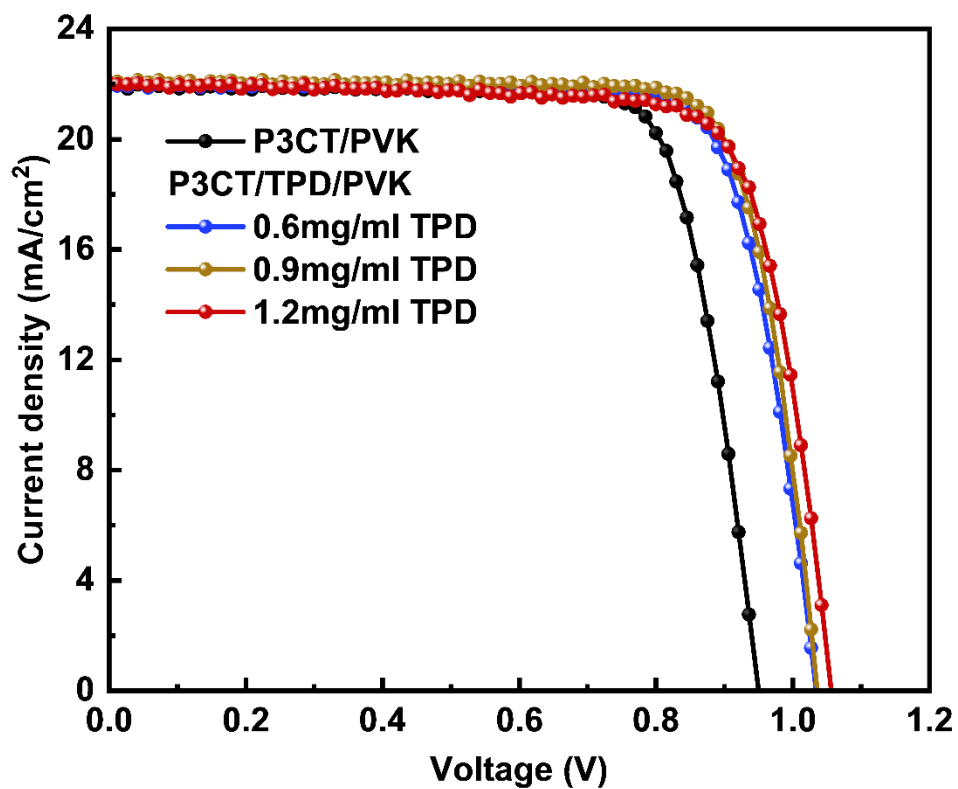

Figure S2  $J$ - $V$  curves of the control and different concentrations of Poly-TPD devices

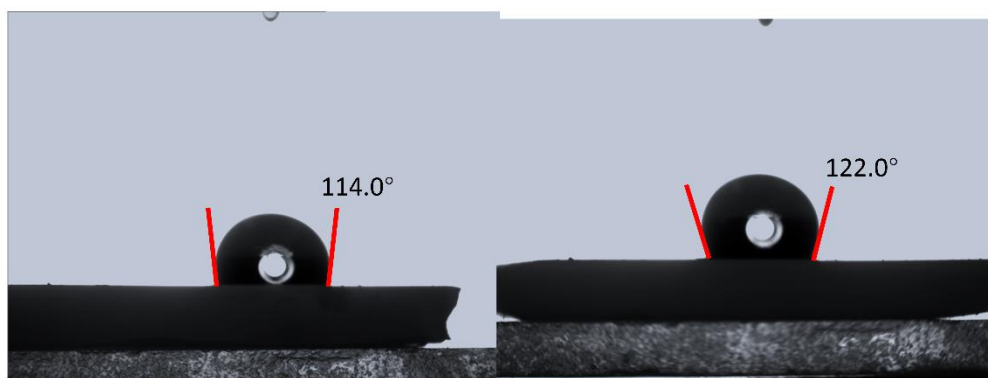

Figure S3 The water contact angles of P3CT-N only film and dual-HTLs film.

Table S1 The detail fitting parameters of the TRPL decay curves.

| <b>Device</b>       | <b><math>\tau_1</math></b> | <b>F1</b> | <b><math>\tau_2</math></b> | <b>F1</b> | <b><math>\tau_{ave}</math></b> |
|---------------------|----------------------------|-----------|----------------------------|-----------|--------------------------------|
| <b>P3CT/PVK</b>     | 31.17                      | 14.63     | 156.63                     | 85.37     | 137.61                         |
| <b>P3CT/TPD/PVK</b> | 9.92                       | 14.02     | 94.13                      | 85.98     | 82.32                          |

Table S2. Average photovoltaic parameters of pristine and dual-HTLs perovskite solar cells

| <b>Device</b>       | <b>V<sub>oc</sub> (V)</b> | <b>J<sub>sc</sub> (mA/cm<sup>2</sup>)</b> | <b>FF (%)</b> | <b>PCE (%)</b> |
|---------------------|---------------------------|-------------------------------------------|---------------|----------------|
| <b>P3CT/PVK</b>     | 1.001±0.011               | 20.511±0.476                              | 78.257±2.453  | 16.061±0.529   |
| <b>P3CT/TPD/PVK</b> | 1.102±0.014               | 22.144±0.463                              | 78.334±1.257  | 19.101±0.488   |
